# Supplementary material for: Synthesis of ferrate (Fe(vi))-coated sand for stabilized reactivity and enhanced treatment of phenol
Source: Royal Society of Chemistry journal article supplement (doi:10.1039/d3ta01950k), 2023-01-01
Supplement: d3ta01950k1.pdf [file d3ta01950k1.pdf]

Supplementary Material for

**Synthesis of ferrate (Fe(VI))-coated sand for stabilized reactivity  
and enhanced treatment of phenol**

Fanny E. K. Okaikue-Woodi<sup>a</sup>, Jessica R. Ray<sup>a,\*</sup>

<sup>a</sup>Department of Civil & Environmental Engineering  
University of Washington, Seattle, Washington 98195-2700 USA

*Address: 3760 E. Stevens Way, NE*

*Campus Box 352700*

*E-mail: jessray@uw.edu*

*Phone: (206) 221-0791*

*Fax: (206) 543-1543*

*<http://https://ray-aimslab.com/>*

**12 pages**  
**experimental description**  
**1 table**  
**13 figures**  
**references**

## 1 **Text S1. Synthesis of potassium ferrate**

2           The potassium ferrate ( $K_2FeO_4$ ) solution was prepared via the wet oxidation process  
3 following a method adapted from Guan et al.<sup>1</sup> A saturated solution of 13 M KOH was prepared,  
4 chilled and stored at 4 °C throughout the synthesis to maintain cold temperature conditions.  
5 Approximately 15 g of  $CaOCl_2$  was added to 25 mL of the saturated KOH solution. The mixture  
6 was stirred for 30-60 min and filtered using a Whatman glass microbore filter (grade GF/A)  
7 paper to obtain a yellow solution of potassium hypochlorite. An additional 20 mL of the  
8 saturated KOH was added to the yellow filtrate, and the mixture was placed in an ice bath for 20-  
9 30 min to precipitate potassium chloride. The potassium chloride suspension was further filtered  
10 with a GF/A filter paper. Then, 8 g of pulverized ferric nitrate was added slowly and in small  
11 portions to the filtrate solution under cooling conditions (5 °C) to form  $K_2FeO_4$ . A VWR  
12 recirculating chiller was used to maintain the temperature of the  $K_2FeO_4$  throughout the  
13 synthesis. The generated solution of  $K_2FeO_4$  was stirred for an hour before the addition of 6 g of  
14 KOH. The mixture was stirred for 20 min and left to cool for 40 min. Then the solution was  
15 centrifuged at 4000 rpm for 10 min. The supernatant solid was discarded and the solid frozen at -  
16 80 °C for 1 hr. The frozen solid was added to 50 mL of 3 M KOH solution pre-chilled at 4 °C.  
17 The mixture was shaken until the  $K_2FeO_4$  solid thawed and dissolved in the KOH solution. The  
18 mixture was filtered into 150 mL of the saturated 13 M KOH solution and placed in an ice bath.  
19 The filtrate solution was left in the ice bath until solid particles started precipitating, then the  
20 filtrate was filtered. The solid  $K_2FeO_4$  precipitate was washed subsequently with pentane (~250  
21 mL), methanol (~ 100 mL) and dichloromethane (~20 mL). The final product was dried at 65 °C  
22 for 4 hrs and stored in a desiccator for future uses. The purity of the Fe(VI) was determined as  
23 described in Text S2 below.

24 Fe(VI) stock solution was freshly prepared in 10 mM borate buffer (pH 9) and used  
25 within 15 min of preparation to minimize Fe(VI) self-decay.

### 26 **Text S2. Quantification of Fe(VI) purity**

27 The purity of Fe(VI) in the K<sub>2</sub>FeO<sub>4</sub> powder was determined by measuring a K<sub>2</sub>FeO<sub>4</sub> powder  
28 and dissolving in 5 mM Na<sub>2</sub>HPO<sub>4</sub>/1 mM Na<sub>2</sub>B<sub>4</sub>O<sub>7</sub> solution (pH 9.25). The Fe(VI) concentration  
29 was determined using the absorbance at 510 nm. This purity of Fe(VI) is then determined as the  
30 ratio of calculated Fe(VI) concentration to the theoretical measured K<sub>2</sub>FeO<sub>4</sub> powder  
31 concentration. The purity of Fe(VI) in the K<sub>2</sub>FeO<sub>4</sub> was estimated at approximately 88%.

32 The purity of Fe(VI) in the Fe(VI)-coated sand was also evaluated. This was achieved by  
33 taking an aliquot of K<sub>2</sub>FeO<sub>4</sub> slurry obtained prior to sand addition and freeze-drying it. The dry  
34 product obtained was then used as K<sub>2</sub>FeO<sub>4</sub> powder for purity calculation and the Fe(VI) purity  
35 was estimated at 8-9%.

### 36 **Text S3. Quantification methods of aqueous Fe species**

37 Aqueous Fe(VI) was measured using the ABTS colorimetric method.<sup>2</sup> Fe(VI) samples  
38 were reacted with 1.82 mM ABTS buffered at pH 4.2 with a 0.6 M acetate, 0.2 M phosphate  
39 buffer.<sup>2</sup> The absorbance of the mixture was determined at 415 nm and used to calculate Fe(VI)  
40 concentration.

41 Aqueous total Fe was determined using inductively coupled plasma – optical emission  
42 spectrophotometer (ICP-OES). Samples taken throughout the study for total Fe analysis were  
43 either in a buffer (i.e., 10 mM borate or phosphate) or in a 1% HNO<sub>3</sub> solution. The buffered  
44 samples were acidified with 1% HNO<sub>3</sub> before analysis. An internal standard solution of 100 µg/L  
45 yttrium in 1% HNO<sub>3</sub> was added to all samples before analysis to normalize changes in Fe signals  
46 from the ICP-OES.

47 The measured aqueous Fe(II) concentration was determined using the colorimetric  
48 ferrozine method.<sup>3</sup> Samples taken during Fe leaching tests and organic compound removal  
49 experiments were reacted with 0.01 M ferrozine prepared in 0.1 M ammonium acetate. The  
50 absorbance of the mixture was measured at 562 nm. Fe(III) can also react with ferrozine to form  
51 the Fe-ferrozine complex with absorbance at 562 nm,<sup>3,4</sup> thus the samples were further reduced by  
52 addition of 1.4 M hydroxylamine hydrochloride in 2 M HCl,<sup>3</sup> and buffered at pH 9.5 with 10 M  
53 ammonium acetate<sup>3</sup> for accurate analysis of Fe(II).

54 The aqueous Fe(III) concentration was determined using the colorimetric KSCN method.  
55 Fe(III) reacts with KSC to form a ferric thiocyanate complex.<sup>5</sup> Samples taken during Fe leaching  
56 tests and organic compound removal experiments were reacted with 0.2 M KSCN and measured  
57 at 476 nm with the UV-Vis spectrophotometer.

#### 58 **Text S4. Choice of buffer**

59 The influence of buffering ions on the oxidation of PMSO by Fe(VI)-coated sand was  
60 investigated using 10 mM Na<sub>2</sub>HPO<sub>4</sub>/NaH<sub>2</sub>PO<sub>4</sub> and 10 mM Na<sub>2</sub>B<sub>4</sub>O<sub>7</sub> buffers at pH 9. A dose of 2  
61 g/L Fe(VI)-coated sand was added to the buffer solutions containing PMSO (700-740 µg/L) and  
62 the mixture was reacted for 1 hr. A 2 mL aliquot was taken at different sampling times and  
63 quenched with 20 µL of 500 mM Na<sub>2</sub>SO<sub>3</sub> then filtered with 0.2µm, 25 mm diameter cellulose  
64 acetate (CA) syringe filters to measure residual PMSO and PMSO<sub>2</sub> using high performance  
65 liquid chromatography (HPLC) methods.

#### 66 **Text S5. HPLC Method**

67 The concentrations of phenol, PMSO and PMSO<sub>2</sub> were quantified using a Dionex  
68 Ultimate 3000 HPLC equipped with a diode array detector and an Ascentis® C18 column (2.1  
69 mm x 15 cm, 3 µm). The mobile phase was 0.1% formic acid in water (A) and acetonitrile (B).

70 The compounds were separated in an isocratic mode of elution at 75% of 0.1% formic acid in  
71 water and 25% acetonitrile. The injection volume was 50  $\mu$ L and the flow rate was 0.2 mL/min.  
72 The wavelength for each compound is given below.

73 **Table S1.** Wavelengths used for HPLC analysis of organic compounds.

| Compounds         | Wavelength (nm) | Retention time (min) |
|-------------------|-----------------|----------------------|
| Phenol            | 271             | 8.99 $\pm$ 0.12      |
| PMSO              | 230             | 4.46 $\pm$ 0.01      |
| PMSO <sub>2</sub> | 265             | 7.64 $\pm$ 0.08      |

74

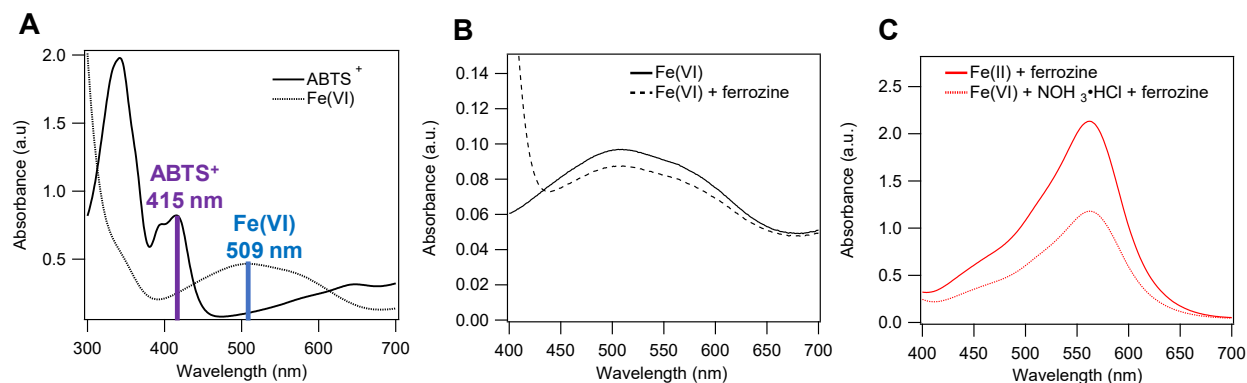

75

76 **Figure S1.** Spectroscopic characterization of the Fe(VI)-coated sand. (A) UV-vis absorbance  
77 spectra of Fe(VI) leached from the Fe(VI)-coated sand (dashed line) and reacted with ABTS  
78 (solid line). (B) UV-vis absorbance of Fe(VI) leached from the media (solid line) and reacted  
79 with ferrozine (dashed line). (C) UV-vis absorbance of Fe-ferrozine complex formed with Fe(II)  
80 chloride (straight line) and with reduction of Fe(VI) (dashed line).

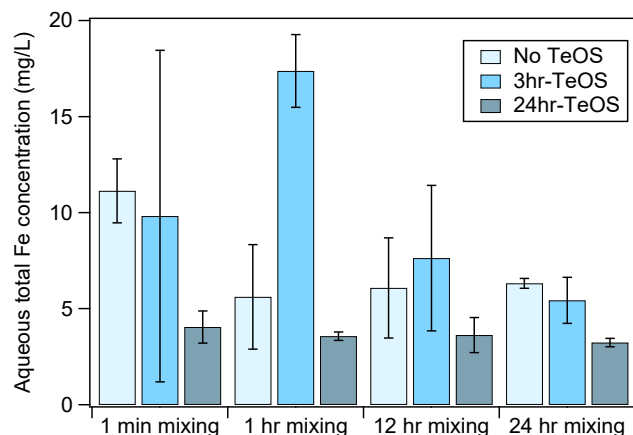

81

82 **Figure S2.** Total aqueous Fe concentration after 1 g/L Fe(VI)-coated sand was stirred in 1%

83 HNO<sub>3</sub> for 1 min, 1 hr, 12 hrs and 24 hrs. The Fe(VI)-coated sand was prepared with virgin sand

84 (no TeOS), 3hr-TeOS sand, and 24hr-TeOS sand.

85

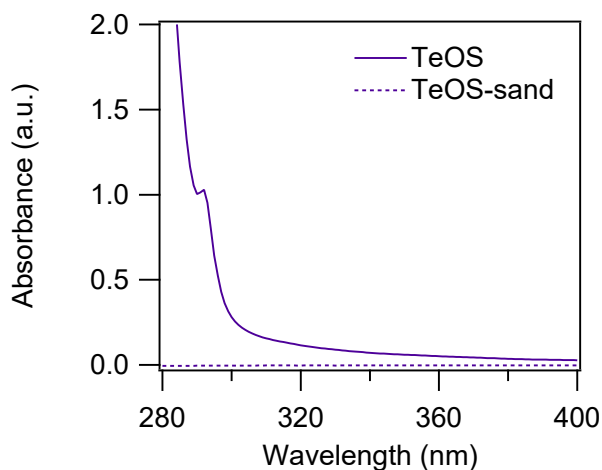

86

87 **Figure S3.** Spectroscopic analysis of TeOS stability on TeOS-coated sand. The UV-Vis

88 spectrum of the supernatant of 1 g/L TeOS-coated sand (dashed line) placed in 10 mM borate

89 buffer and sonicated was compared to the UV-Vis spectrum of TeOS (4 mL solution). The

90 absence of a peak at 292 nm in the spectrum of the TeOS-sand indicates that TeOS did not leach

91 from the TeOS-coated sand surface.

92

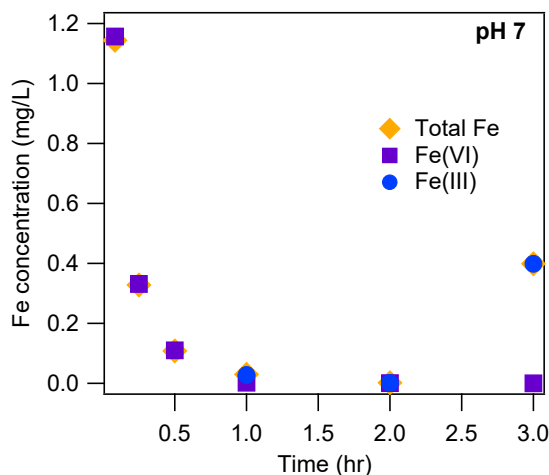

93

94 **Figure S4.** Kinetics of Fe(VI), Fe(III) and total Fe leached from 1 g/L Fe(VI)-coated sand into a  
95 10 mM  $\text{Na}_2\text{B}_4\text{O}_7$  solution at pH 7 as a function of time. Total Fe refers to the total Fe leached  
96 into solution at a given time.

97

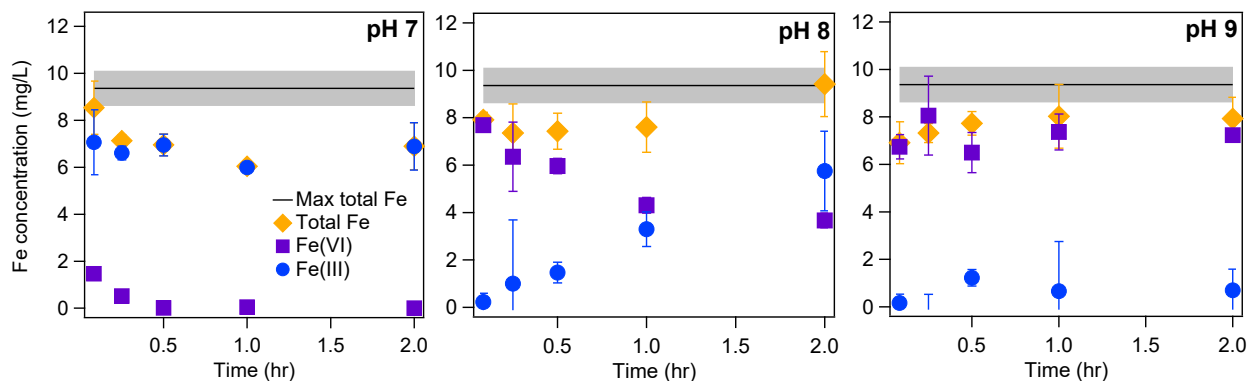

98

99 **Figure S5.** Kinetics of Fe(VI), Fe(III) and total Fe leached from 1 g/L Fe(VI)-coated sand with  
100 3hr-TeOS sand modification into a 10 mM  $\text{Na}_2\text{HPO}_4/\text{NaH}_2\text{PO}_4$  solution at pH 7, 8, 9 as a  
101 function of time. Max total Fe refers to the maximum mass of Fe that would leach of the surface  
102 of Fe(VI)-coated sand. This was determined by mixing 1 g/L Fe(VI)-coated sand into 1%  $\text{HNO}_3$   
103 and measuring total Fe in solution. Total Fe refers to the total Fe leached into solution at a given  
104 time.

105

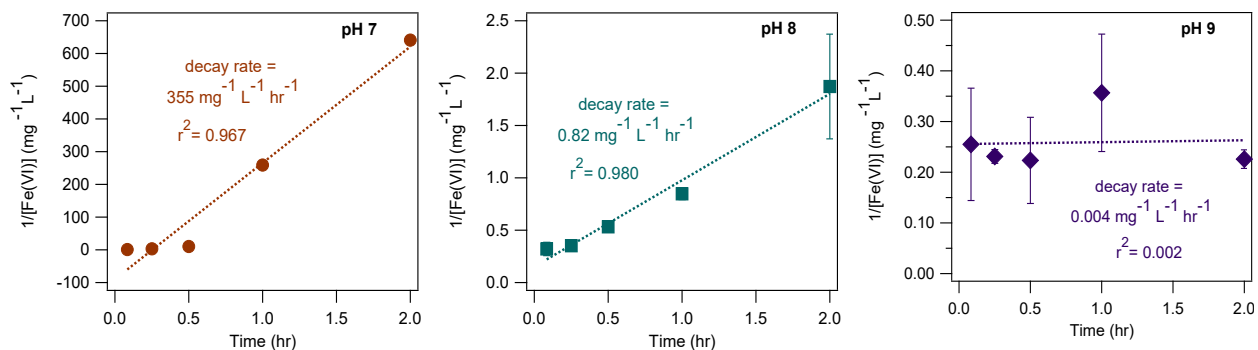

106

107 **Figure S6.** Decay kinetics of aqueous Fe(VI) from 1 g/L Fe(VI)-coated sand in a 10 mM 10 mM

108  $Na_2B_4O_7$  at pH 7, 8, and 9.  $r^2$  denotes the correlation coefficient of the fitted linear regression

109 curve.

110

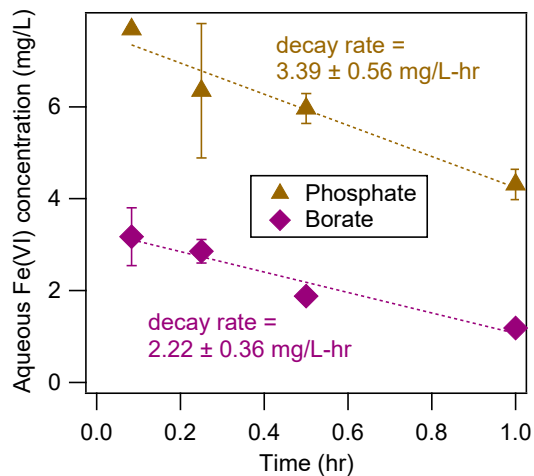

111

112 **Figure S7.** Aqueous Fe(VI) concentration leached from 1 g/L Fe(VI)-coated sand in a 10 mM

113  $Na_2HPO_4/NaH_2PO_4$  and 10 mM  $Na_2B_4O_7$  solution at pH 8.

114



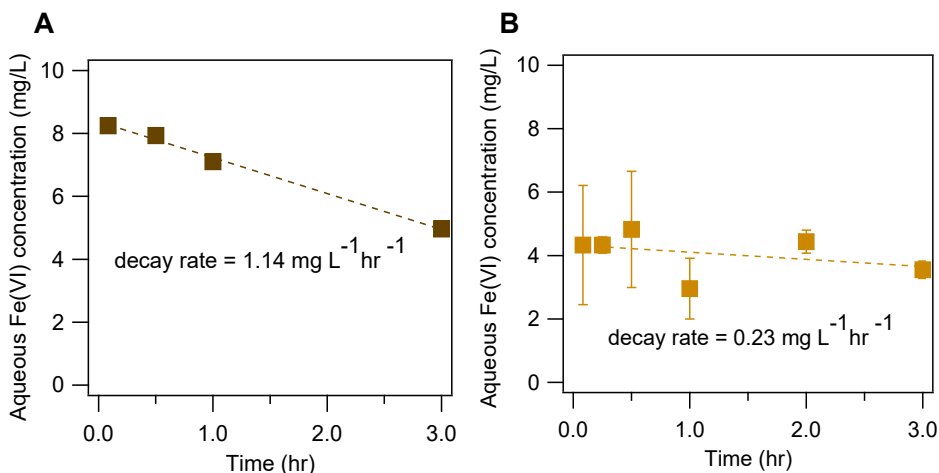

115

116 **Figure S8.** Decay of Fe(VI) in (A) 0.21 g/L K<sub>2</sub>FeO<sub>4</sub> powder and (B) 1 g/L Fe(VI)-coated sand.

117 The 0.21 g/L initial concentration of K<sub>2</sub>FeO<sub>4</sub> was chosen to obtain a concentration of Fe(VI) that

118 will be equivalent to the concentration of total Fe in the Fe(VI)-coated sand system.

119

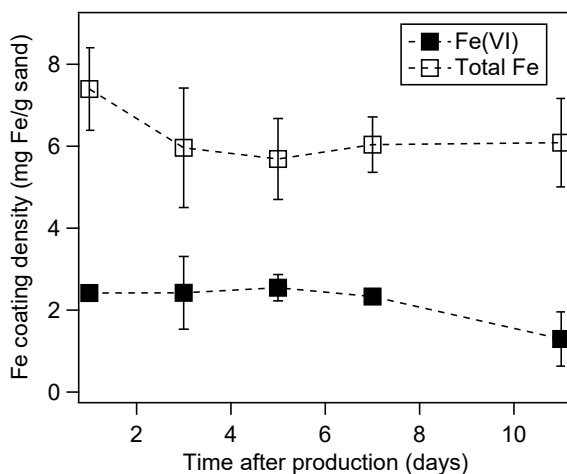

120

121 **Figure S9.** Total Fe and Fe(VI) coating mass leached from Fe(VI)-coated sand surface as a

122 function of time. 3 g/L Fe(VI)-coated sand was mixed with 1% HNO<sub>3</sub> for the total Fe

123 measurement. For the Fe(VI) coating mass determination, 3 g/L Fe(VI)-coated sand was mixed

124 with 5 mM Na<sub>2</sub>HPO<sub>4</sub>/1mM NaB<sub>4</sub>O<sub>7</sub> buffer.

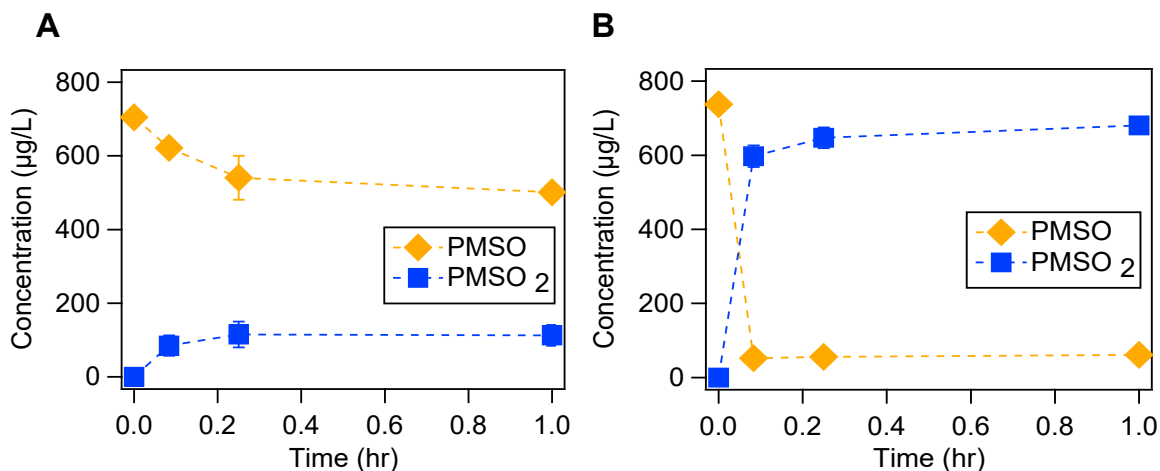

125

126 **Figure S10.** Oxidation of PMSO to PMSO<sub>2</sub> by 2 g/L Fe(VI)-coated sand in (A) 10 mM  
 127 phosphate buffer and (B) 10 mM borate buffer at pH 9. The initial PMSO concentration was  
 128 705±20 µg/L PMSO in the phosphate buffer and 738±14 µg/L PMSO in the borate buffer.

129

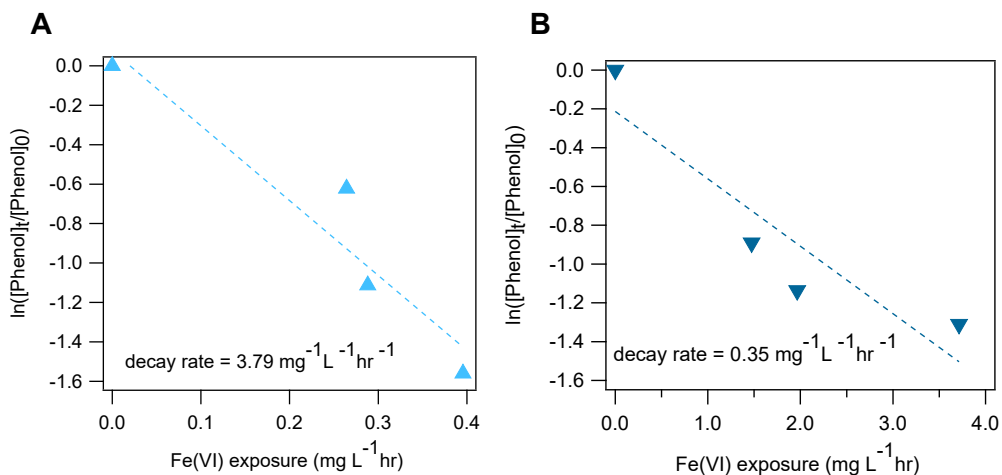

130

131 **Figure S11.** Linear fitting of the reaction kinetics of 219±12 µg/L phenol and (A) 12.6 mg/L  
 132 Fe(VI) powder and (B) 2 g/L Fe(VI)-coated sand in 10 mM borate buffer pH 9.

133

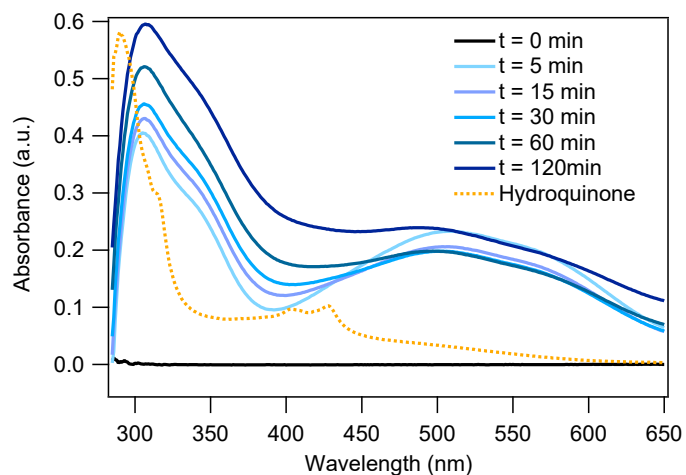

134

135 **Figure S12.** UV-Vis scans of  $219 \pm 12 \mu\text{g/L}$  phenol reacted with 2 g/L Fe(VI)-coated sand in 10  
136 mM borate buffer pH 9 measured at various time intervals within the 120-min and a  
137 hydroquinone blank solution.

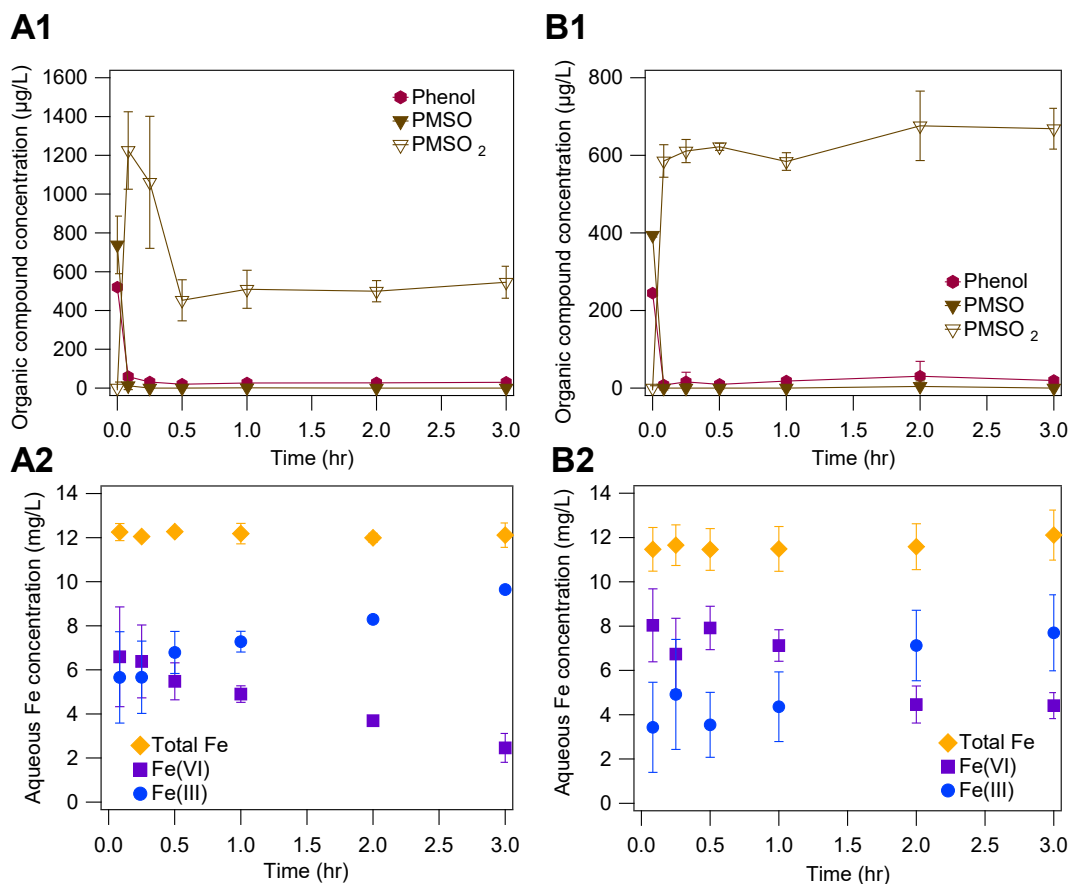

139

140 **Figure S13. (Row 1)** Degradation of phenol and oxidation of PMSO at different concentrations

141 **(A.** 520±8.1 µg/L phenol and 739±148 µg/L PMSO; **B.** 245±3.0 µg/L phenol and 394±4.7 µg/L

142 PMSO) by 2 g/L Fe(VI)-coated sand and **(row 2)** the corresponding changes in aqueous Fe

143 concentrations.

#### 144 **References**

- 145 1. W. Guan, Z. Xie and J. Zhang, *J. Spectro.*, 2014, **2014**, 1-8.
- 146 2. Y. Lee, J. Yoon and U. Von Gunten, *Water Res.*, 2005, **39**, 1946-1953.
- 147 3. E. Viollier, P. W. Inglett, K. Hunter, A. N. Roychoudhury and P. Van Cappellen, *Appl.*  
148 *Geochem.*, 2000, **15**, 785-790.
- 149 4. D. L. Giokas, E. K. Paleologos and M. I. Karayannis, *Anal. Bioanal. Chem.*, 2002, **373**,  
150 237-243.
- 151 5. H. Huang, D. Sommerfeld, B. C. Dunn, E. M. Eyring and C. R. Lloyd, *J. Phys. Chem. A*,  
152 2001, **105**, 3536-3541.

153
